# Supplementary material for: Use of Raman spectroscopy to study rat lung tissues for distinguishing asphyxia from sudden cardiac death
Source: Royal Society of Chemistry journal article supplement (doi:10.1039/d3ra07684a), 2024-01-01
Supplement: d3ra07684a1.pdf [file d3ra07684a1.pdf]

## Supplementary Material

### Use of Raman spectroscopy to detect rat lung tissues to distinguish asphyxia from sudden cardiac death

Kai Zhang<sup>1,2,#</sup>, Ruina Liu<sup>3,#</sup>, Xin Wei<sup>2</sup>, Zhenyuan Wang<sup>2,\*</sup>, Ping Huang<sup>1,\*</sup>

<sup>1</sup>Shanghai Key Lab of Forensic Medicine, Key Lab of Forensic Science, Ministry of Justice, China, Academy of Forensic Science, Shanghai, People's Republic of China.

<sup>2</sup>NHC Key Laboratory of Forensic Science, Department of Forensic Pathology, College of Forensic Medicine, Xi'an Jiaotong University, Xi'an, People's Republic of China.

<sup>3</sup>Department of Psychiatry, The First Affiliated Hospital of Xi'an Jiaotong University, Xi'an, People's Republic of China

#### Supplementary Figures

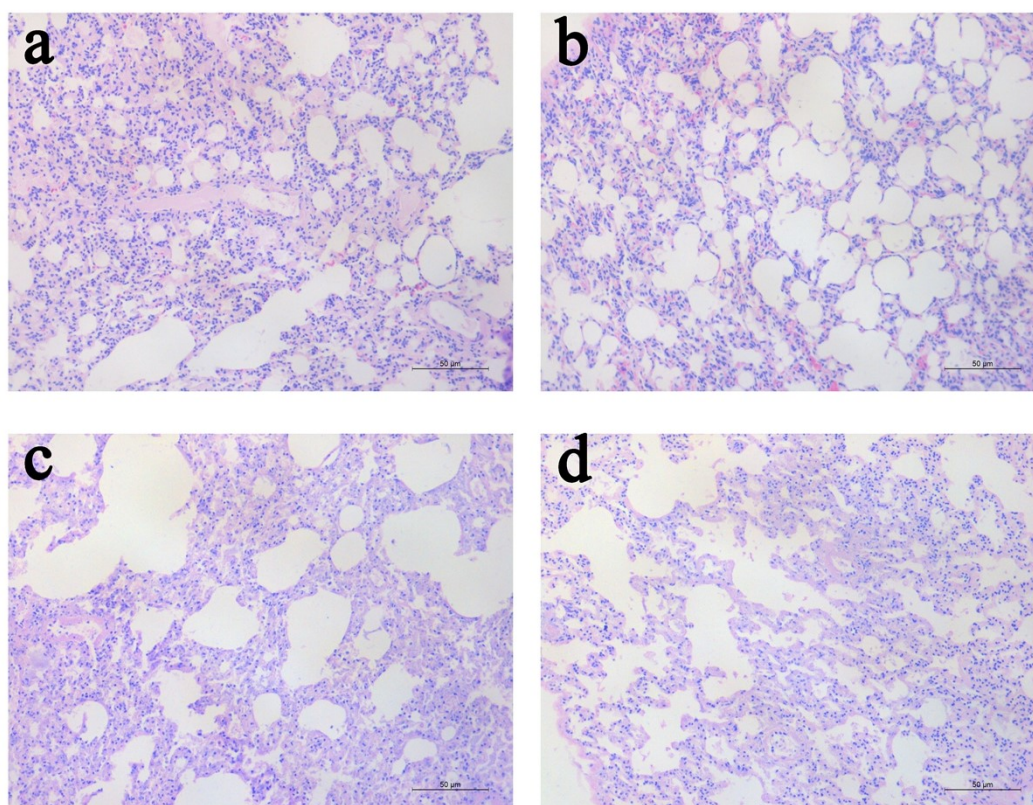

**Fig. S1** Optical images (10× objective and a 10× eyepiece) of HE stained lung tissues of rats died from asphyxia and SCD. (a) asphyxia group, collected immediately after death. (b) SCD group, collected immediately after death. (c) asphyxia group, collected 24 h after death. (d) SCD group, collected 24 h after death. It can be found that it is impossible to distinguish asphyxia from SCD by morphological observation under the microscope, either for fresh or decomposed lung tissues, because there are no specific morphological changes.

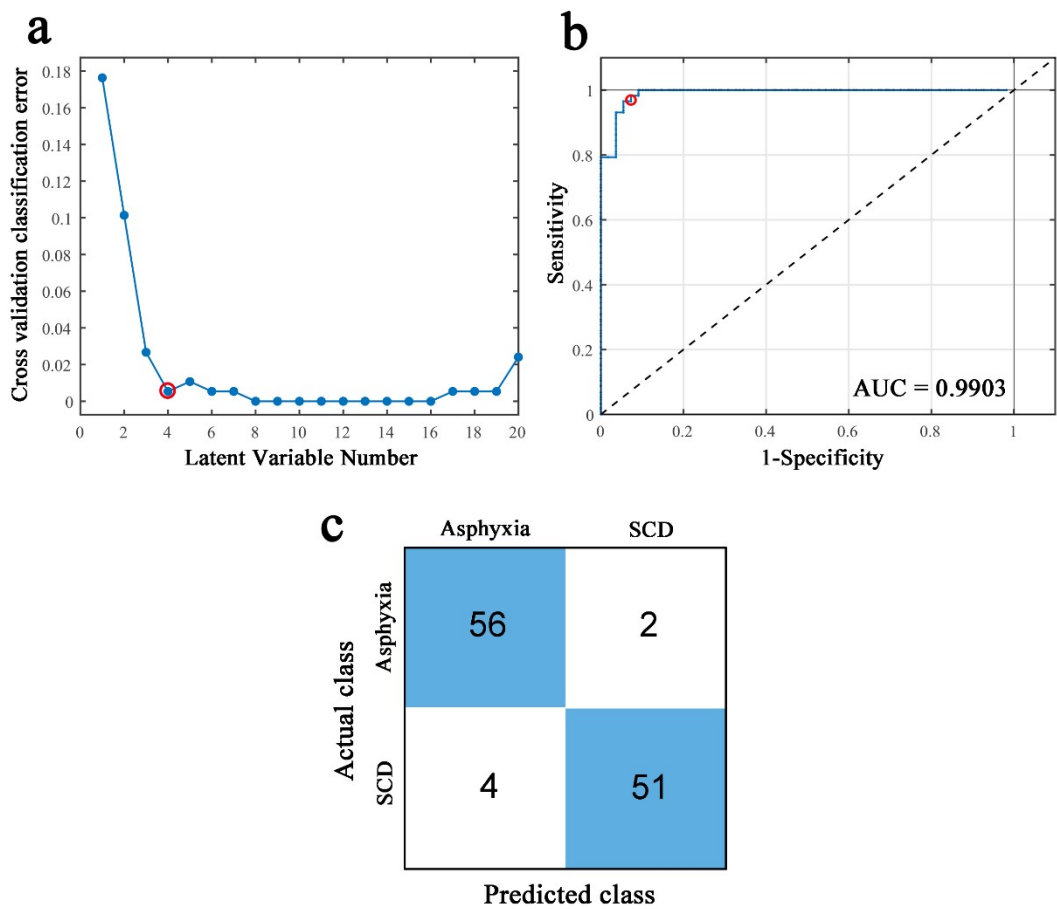

**Fig. S2** (a) The plot of the classification error rate versus the number of LVs for the PLS-DA model. (b) The result of ROC curve analysis, where the area under the curve (AUC) is 0.9903. (c) The confusion matrix of external validation in the PLS-DA model, where the accuracy is 0.9469. SCD: sudden cardiac death.

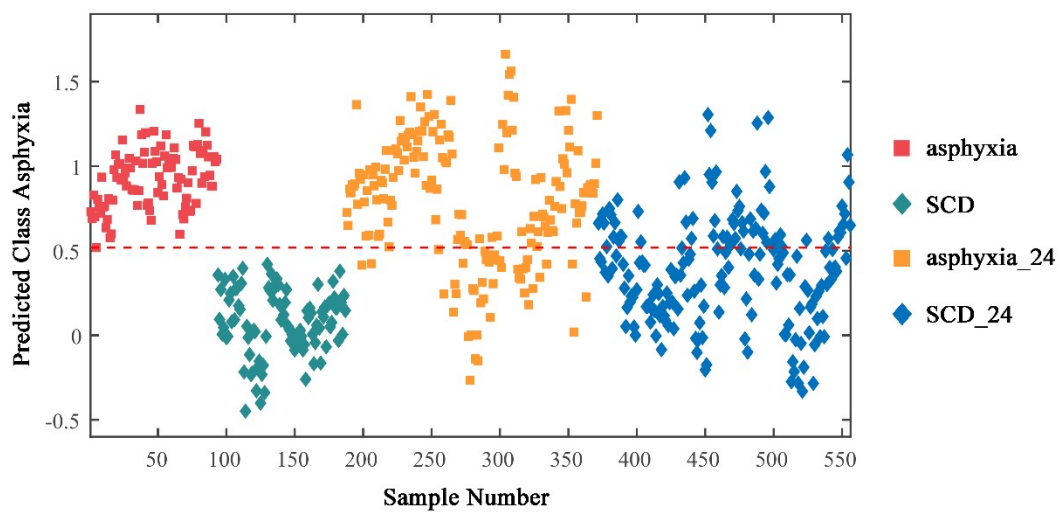

**Fig. S3** Classification results of decomposed lung tissues in the PLS-DA model built with fresh lung

tissues. The classification model built with fresh tissue samples was used to try to distinguish the spectra of decomposed tissue samples (collected at 24 h after death), but the performance is not satisfactory. SCD: sudden cardiac death.

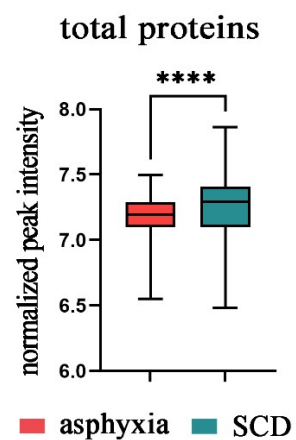

**Fig. S4** The comparison of total protein content in the lung tissues between the two causes of death, represented by the sum of the intensities of peaks at  $1637\text{ cm}^{-1}$ ,  $1558\text{ cm}^{-1}$ , and  $1230\text{ cm}^{-1}$ . SCD: sudden cardiac death.
